# Supplementary material
Source: PubMed Central journal article supplement (PMC3903390)
Supplement: NIHMS557236-supplement-Supplementary_Data.pdf [file NIHMS557236-supplement-Supplementary_Data.pdf]

**Supplemental Table 1A:** Pilot Study Results of Nodal Uptake by PET and CL Imaging.

| Patient No. | Primary Uptake Site |                                   | Contralateral Site |                                   |
|-------------|---------------------|-----------------------------------|--------------------|-----------------------------------|
|             | PET (MBq/mLmax)     | CL imaging (c/s/cm <sup>2</sup> ) | PET (MBq/mLmax)    | CL imaging (c/s/cm <sup>2</sup> ) |
| 1           | 0.0333              | 38.5                              | 0.0074             | 11.0                              |
| 2           | 0.0259              | 21.60                             | 0.0037             | 9.54                              |
| 3           | 0.0518              | 12.8                              | 0.0074             | 8.79                              |
| 4           | 0.0111              | 10.51                             | 0.00371            | 10.00                             |

**Supplemental Table 1B:** Pilot Study Results of Nodal Uptake by PET and CL Imaging. Patients 5' and 6' indicate patients with lymphoma that were scanned even though they did not have detectable disease on PET. Therefore these were added as control, and the data points are indicated as blue "x" in Supplemental Figure 1.

| Patient no. | Primary Uptake Site |                                   | Contralateral Site |                                   |
|-------------|---------------------|-----------------------------------|--------------------|-----------------------------------|
|             | PET (MBq/mLmax)     | CL imaging (c/s/cm <sup>2</sup> ) | PET (MBq/mLmax)    | CL imaging (c/s/cm <sup>2</sup> ) |
| 1           | 0.0330              | 38.5                              | 0.0074             | 11.0                              |
| 2           | 0.0259              | 21.60                             | 0.0037             | 9.54                              |
| 3           | 0.0518              | 12.8                              | 0.0074             | 8.79                              |
| 4           | 0.0111              | 10.51                             | 0.00371            | 10.00                             |
| 5'          | 0.0038              | 10.0                              |                    |                                   |
| 6'          | 0.0074              | 8.9                               |                    |                                   |

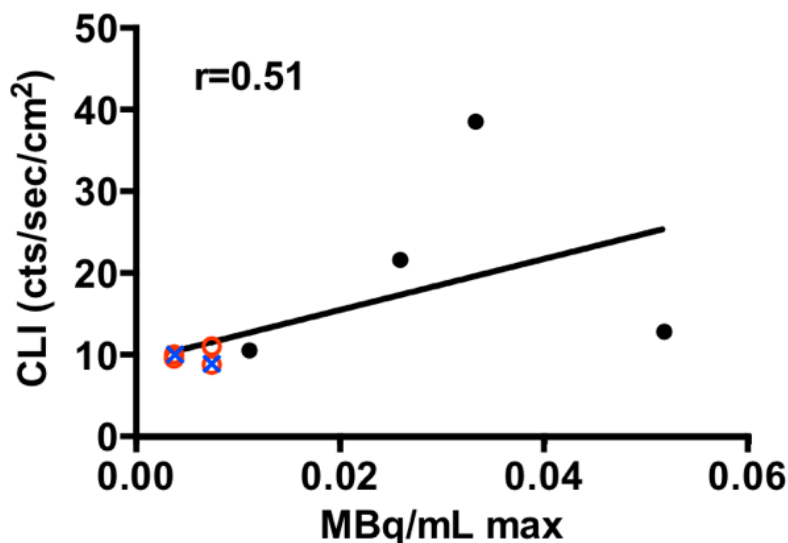

**Supplemental Figure 1:** Same as Figure 3 but with patients 5 and 6 added. These patients had no <sup>18</sup>F-FDG-avid lymph nodes.
